# Supplementary material
Source: PubMed Central journal article supplement (PMC5864553)
Supplement: NIHMS941557-supplement-2.pdf [file NIHMS941557-supplement-2.pdf]

## Supplementary note 1

### Antibody information for flow cytometry.

| Supplier      | species     | molecule       | fluorophore  | Clone       | Dilution | Catalog #     | Lot #       |
|---------------|-------------|----------------|--------------|-------------|----------|---------------|-------------|
| Biologend     | mouse       | B220           | BV650        | RA3-6B2     | 1:400    | 103241        | B219229     |
|               |             | Bcl-2          | AF647        | BCL10C4     | 1:400    | 633510        | B185992     |
|               |             | CD3 $\epsilon$ | PE-Cy5       | 145-2C11    | 1:400    | 100310        | B206980     |
|               |             | CD4            | BV605        | RM4-5       | 1:400    | 100548        | B234834     |
|               |             | CD8 $\alpha$   | BV650        | 53-6.7      | 1:400    | 100741        | B212054     |
|               |             | CD11b          | BV510        | M1/70       | 1:400    | 101245        | B205619     |
|               |             | CD11c          | BV605        | N418        | 1:400    | 117334        | B214953     |
|               |             | CD24           | PE           | M1/69       | 1:400    | 101808        | B136399     |
|               |             | CD45.2         | BV650        | 104         | 1:400    | 109835        | B204435     |
|               |             | Ep-CAM         | PE-Cy7       | G8.8        | 1:400    | 118216        | B190320     |
|               |             | IL-7R $\alpha$ | PE           | SB-199      | 1:50     | 121112        | B189668     |
|               |             | Ly6C           | PerCPCy5.5   | HK1.4       | 1:400    | 129012        | B229409     |
|               |             | Ly6G           | Pacific Blue | 1A8         | 1A8      | 127612        | B200367     |
|               |             | PD-1           | PE-Cy7       | 29F.1A12    | 1:400    | 135216        | B217245     |
|               |             | TSLPR          | Biotin       | 22H9        | 1:400    | part: 93982   | B229504     |
|               |             | IL-1 $\alpha$  | PE           | ALF-161     | 1:50     | 503203        | B241329     |
|               | human       | CD3            | PerCPCy5.5   | SK7         | 1:400    | 344808        | B216158     |
|               |             | CD14           | AF647        | HCD14       | 1:400    | 325612        | B176937     |
|               |             | CD16           | BV421        | 3G8         | 1:400    | 302038        | B168092     |
|               |             | CD19           | BV650        | HIB19       | 1:400    | 302237        | B200187     |
|               |             | CD56           | BV605        | HCD56       | 1:400    | 318333        | B195943     |
|               |             | CD66b          | PE/Cy7       | G10F5       | 1:400    | 305116        | B225767     |
|               | mouse/human | streptavidin   | PE/Cy7       | n.a.        | 1:500    | 405206        | B207311     |
| eBioscience   | mouse       | B220           | PE/Cy5       | RA3-6B2     | 1:400    | 15-0452-82    | E06147-1634 |
|               |             | CD45.2         | APC          | 104         | 1:400    | 17-0454-82    | E07156-1632 |
|               |             | Foxp3          | eFluor450    | FJK-16s     | 1:300    | 48-5773-82    | 4303738     |
|               |             | MHC II         | AF700        | M5/114.15.2 | 1:400    | 56-5321-82    | E09021-1632 |
|               |             | Isotype ctrl   | Biotin       | eB149-10H5  |          | 13-4031-82    | E027212     |
|               | mouse/human | Annexin V      | APC          | n.a.        | 1:100    | BMS306APC/100 | 142831000   |
| BD Pharmingen | mouse       | SiglecF        | PE           | E50-2440    | 1:400    | 552126        | 7058859     |
| BD Bioscience | mouse/human | Ki67           | PerCPCy5.5   | B56         | 1:400    | 561284        | 7075562     |
| Invitrogen    | mouse       | CD44           | AF700        | IM7         | 1:400    | 56-0441-82    | 4329936     |

**Antibody information for immunohistochemistry staining.**

| <b>Supplier</b> | <b>species</b> | <b>molecule</b>            | <b>source</b> | <b>Working conc.</b> | <b>Catalog #</b> | <b>Lot #</b> |
|-----------------|----------------|----------------------------|---------------|----------------------|------------------|--------------|
| Lifespan        | human          | TSLPR                      | Goat          | 0.5 µg/ml            | LS-C150093       | 72257        |
| Cell signaling  | mouse          | Cleaved caspase 3 (ASP175) | Rabbit        | 2 µg/ml              | 9661             | 43           |
